# Supplementary material
Source: Research Square preprint supplement (doi:10.21203/rs.3.rs-9392331/v1)
Supplement: Supplementary file 1 [file 0d3d2aa13dcfe2aaf4f3fe0a.docx]

**TYPICAL CASE**

A 59-year-old male patient was admitted with the chief complaints of "15-year history of type 2 diabetes mellitus and recurrent ulceration and infection of the right foot for 7 months." The outpatient diagnosis included: 1. Right diabetic foot (Wagner stage 4); 2. Diabetic peripheral neuropathy; 3. Type 2 diabetes mellitus. The patient underwent surgical treatment of "right foot debridement + transverse tibial bone grafting." Postoperative follow-up at 12 months showed good wound healing of the right foot with no recurrence of ulceration (see Figures a–j).


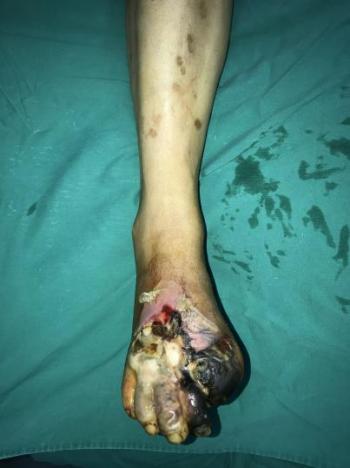

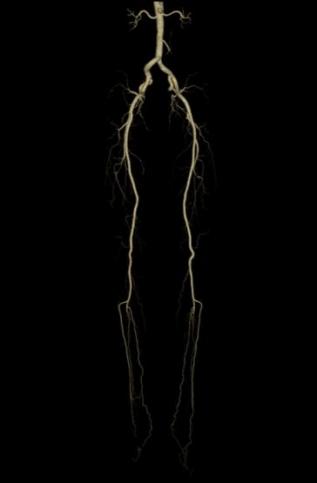

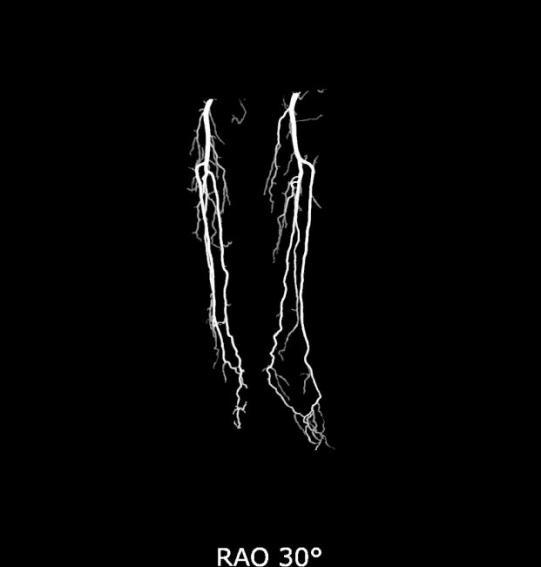

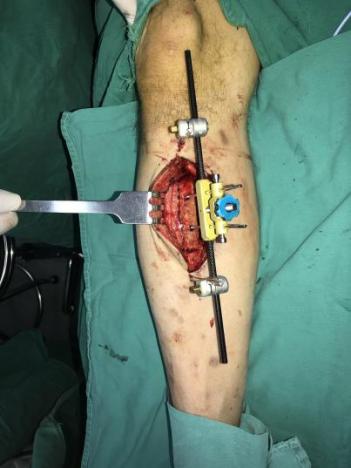

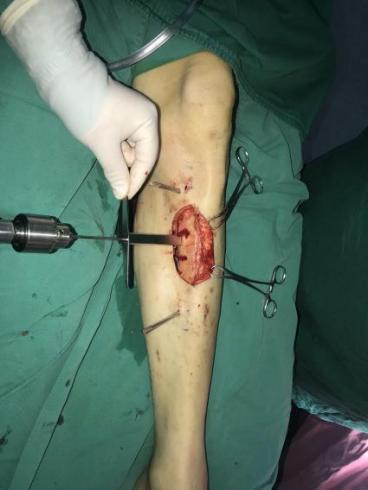


Figure a Figure b Figure c Figure d Figure e


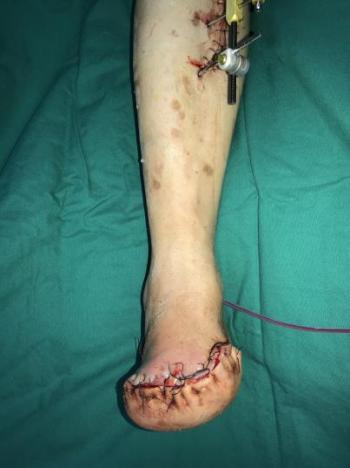

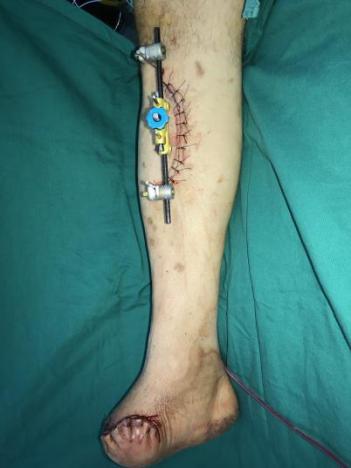

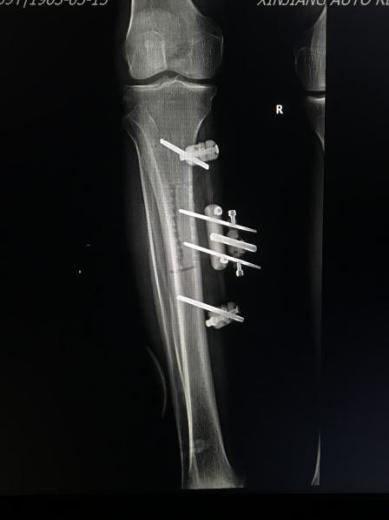

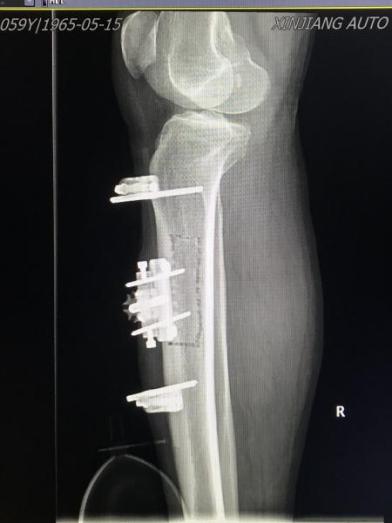

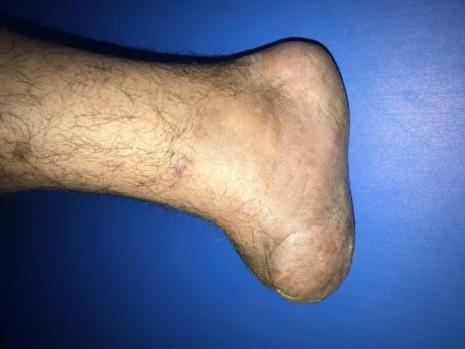


Figure f Figure g Figure h Figure i Figure j

### **Figure Legends**

**Figure a:** Preoperative photograph showing gangrene and infection involving the dorsum of the right foot and the first to fourth toes.

**Figures b–c:** Lower limb CTA demonstrating occlusion of the right dorsalis pedis artery.

**Figures d–g:** Intraoperative views showing completed foot debridement and transverse tibial bone transport (TTT).

**Figures h–i:** Postoperative radiographs revealing stable fixation of the external fixator and satisfactory alignment of the tibial osteotomy site.

**Figure j:** Twelve-month postoperative follow-up showing well-healed wounds of the right foot with no recurrence of ulceration.
